# Supplementary material for: Sesquiterpene Lactones Isolated from Centaurea cineraria L. subsp. cineraria Inhibit the Radicle Growth of Broomrape Weeds
Source: MDPI journal article supplement (doi:10.3390/plants13020178), 2024-01-09
Supplement: s1 [file s1]

## Supporting Information

# Sesquiterpene Lactones Isolated from *Centaurea cineraria* L. subsp. *cineraria* Inhibit the Radicle Growth of Broomrape Weeds

Jesús G. Zorrilla <sup>1,2</sup>, Michele Innangi <sup>3</sup>, Antonio Cala Peralta <sup>2</sup>, Gabriele Soriano <sup>1</sup>,  
Maria Teresa Russo <sup>1</sup>, Marco Masi <sup>1,\*</sup>, Mónica Fernández-Aparicio <sup>4,\*</sup> and Alessio Cimmino <sup>1</sup>

- <sup>1</sup> Department of Chemical Sciences, University of Naples Federico II, Complesso Universitario Monte S. Angelo, Via Cintia, 80126 Naples, Italy; [jesus.zorrilla@uca.es](mailto:jesus.zorrilla@uca.es) (J.G.Z.); [gabriele.soriano@unina.it](mailto:gabriele.soriano@unina.it) (G.S.); [mariaateresa.russo2@unina.it](mailto:mariaateresa.russo2@unina.it) (M.T.R.); [alessio.cimmino@unina.it](mailto:alessio.cimmino@unina.it) (A.C.)
- <sup>2</sup> Allelopathy Group, Department of Organic Chemistry, Facultad de Ciencias, Institute of Biomolecules (INBIO), University of Cadiz, C/Avenida República Saharaui, s/n, 11510 Puerto Real, Spain; [antonio.cala@uca.es](mailto:antonio.cala@uca.es)
- <sup>3</sup> EnvixLab, Department of Biosciences and Territory, University of Molise, Contrada Fonte Lappone, 86090 Pesche, Italy; [michele.innangi@unimol.it](mailto:michele.innangi@unimol.it)
- <sup>4</sup> Department of Plant Breeding, Institute for Sustainable Agriculture (IAS), CSIC, Avenida Menéndez Pidal s/n, 14004 Córdoba, Spain
- \* Correspondence: [marco.masi@unina.it](mailto:marco.masi@unina.it) (M.M.); [monica.fernandez@ias.csic.es](mailto:monica.fernandez@ias.csic.es) (M.F.-A.)

## Supporting Information

|                                                                                                                               |   |
|-------------------------------------------------------------------------------------------------------------------------------|---|
| Figure S1. <sup>1</sup> H NMR spectrum of isocnicin (1) recorded in CDCl <sub>3</sub> at 400 MHz .....                        | 2 |
| Figure S2. ESI MS spectrum of isocnicin (1) recorded in positive mode .....                                                   | 2 |
| Figure S3. <sup>1</sup> H NMR spectrum of cnicin (2) recorded in CDCl <sub>3</sub> at 400 MHz.....                            | 3 |
| Figure S4. ESI MS spectrum of cnicin (2) recorded in positive mode .....                                                      | 3 |
| Figure S5. <sup>1</sup> H NMR spectrum of salonitenolide (3) recorded in MeOD at 400 MHz .....                                | 4 |
| Figure S6. ESI MS spectrum of salonitenolide (3) recorded in positive mode .....                                              | 4 |
| Figure S7. <sup>1</sup> H NMR spectrum of 11β,13-dihydrosalonitenolide (4) recorded in CDCl <sub>3</sub> at 400 MHz.....      | 5 |
| Figure S8. ESI MS spectrum of 11β,13-dihydrosalonitenolide (4) recorded in positive mode.....                                 | 5 |
| Figure S9. <sup>1</sup> H NMR spectrum of 8,15-O,O'-diacetylsalonitenolide (5) recorded in CDCl <sub>3</sub> at 400 MHz ..... | 6 |
| Figure S10. ESI MS spectrum of 8,15-O,O'-diacetylsalonitenolide (5) recorded in positive mode.....                            | 6 |

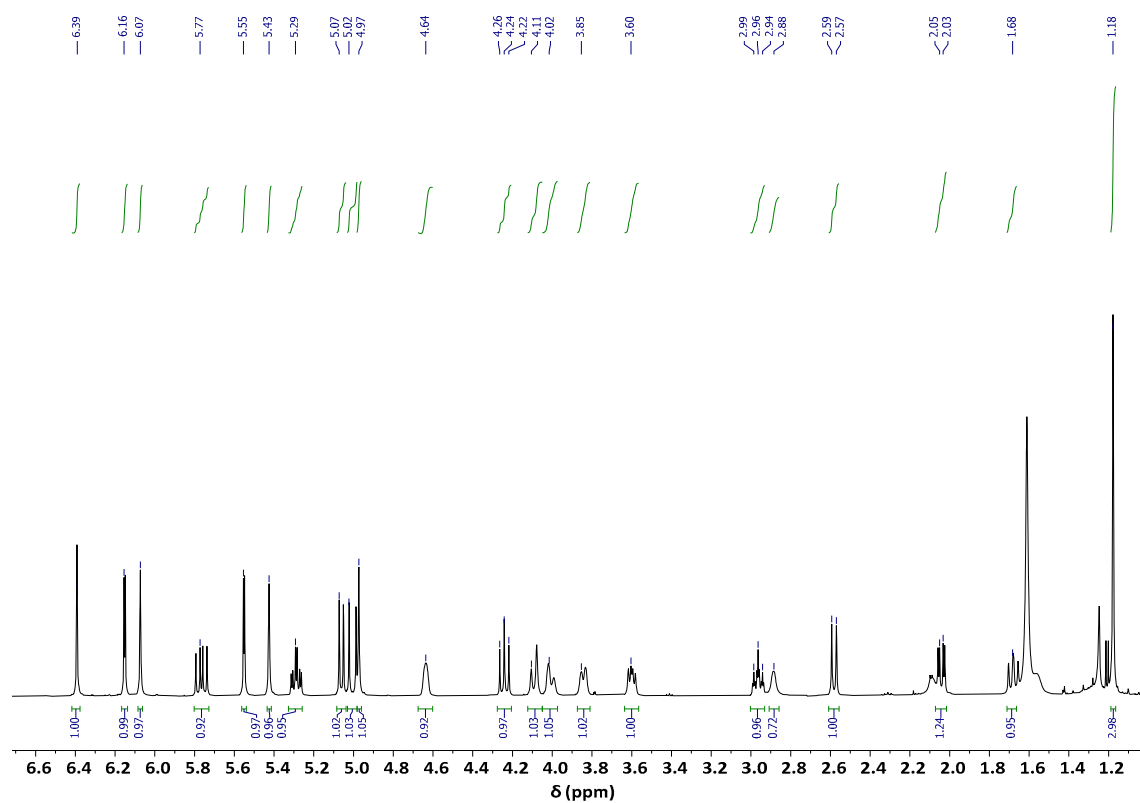

**Figure S1.** <sup>1</sup>H NMR spectrum of isocnicin (1) recorded in CDCl<sub>3</sub> at 400 MHz.

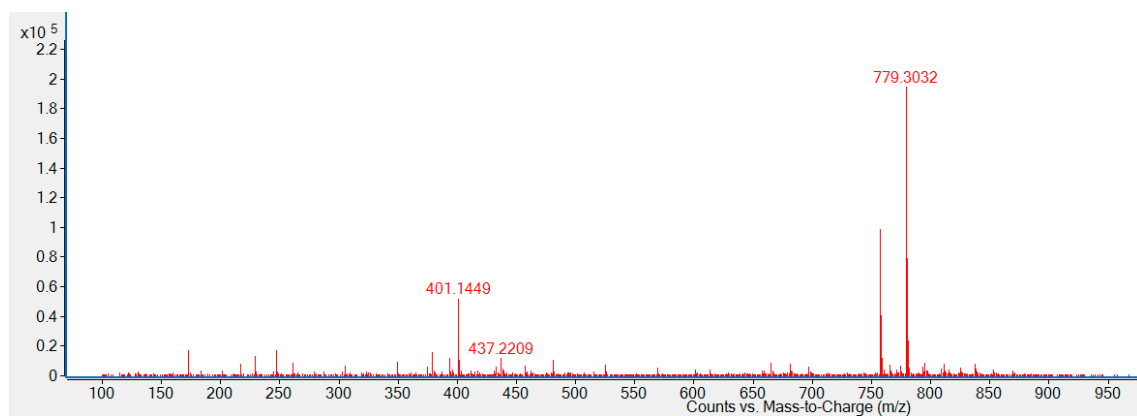

**Figure S2.** ESI MS spectrum of isocnicin (1) recorded in positive mode.

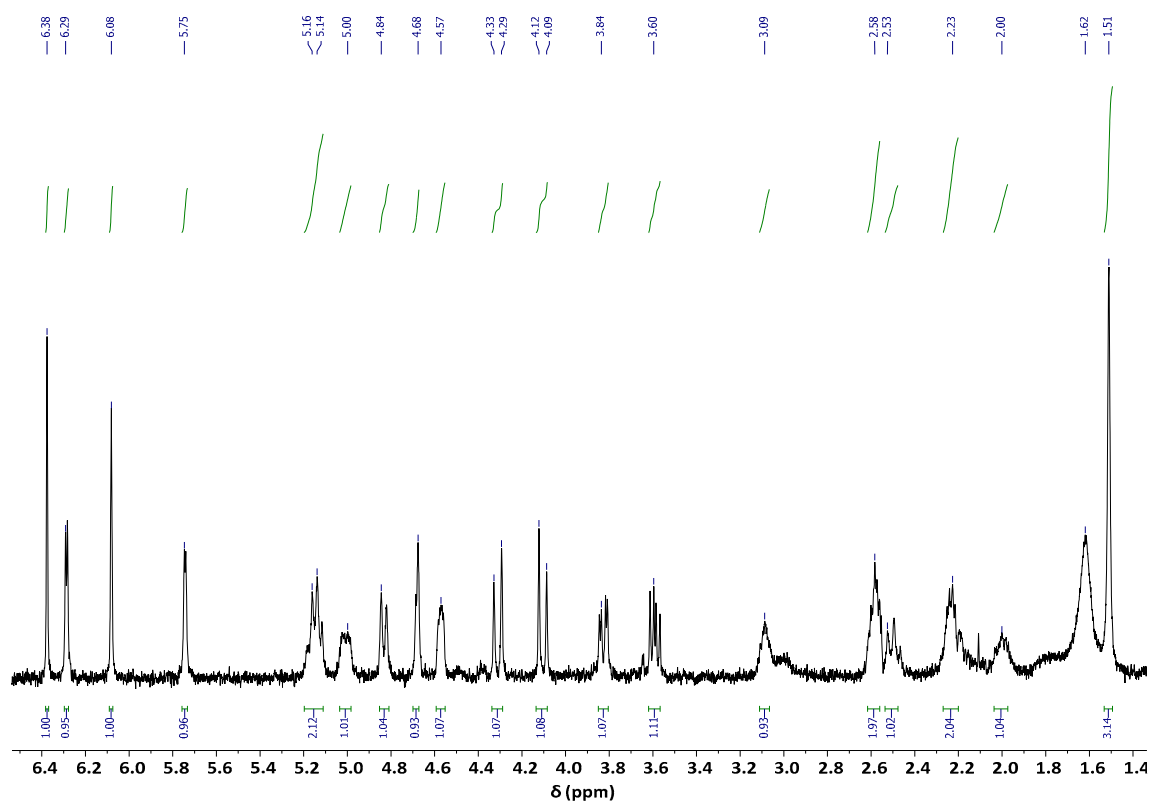

Figure S3. <sup>1</sup>H NMR spectrum of cnicin (2) recorded in CDCl<sub>3</sub> at 400 MHz.

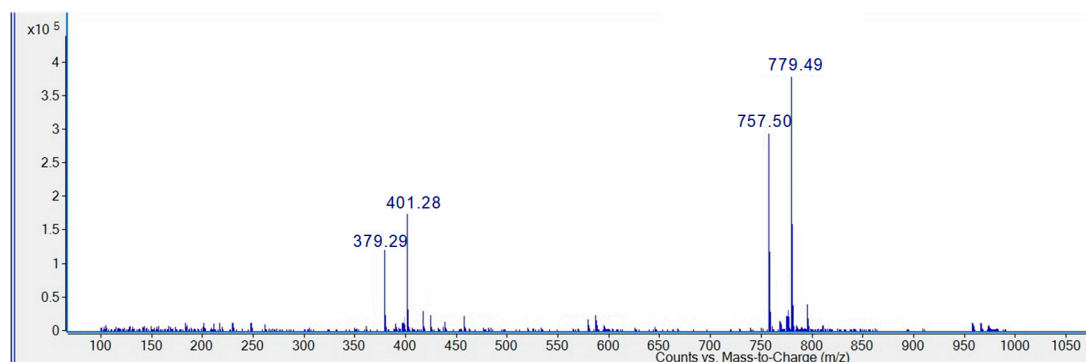

Figure S4. ESI MS spectrum of cnicin (2) recorded in positive mode.

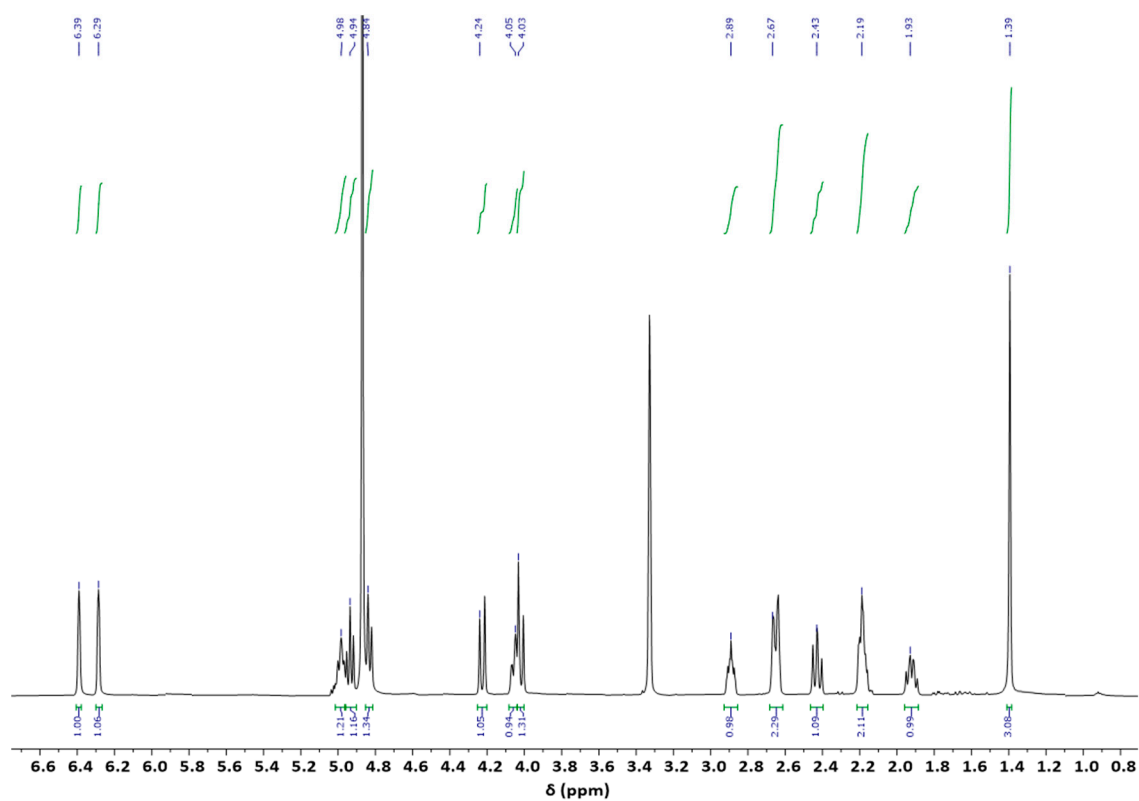

**Figure S5.** <sup>1</sup>H NMR spectrum of salonitenolide (3) recorded in MeOD at 400 MHz.

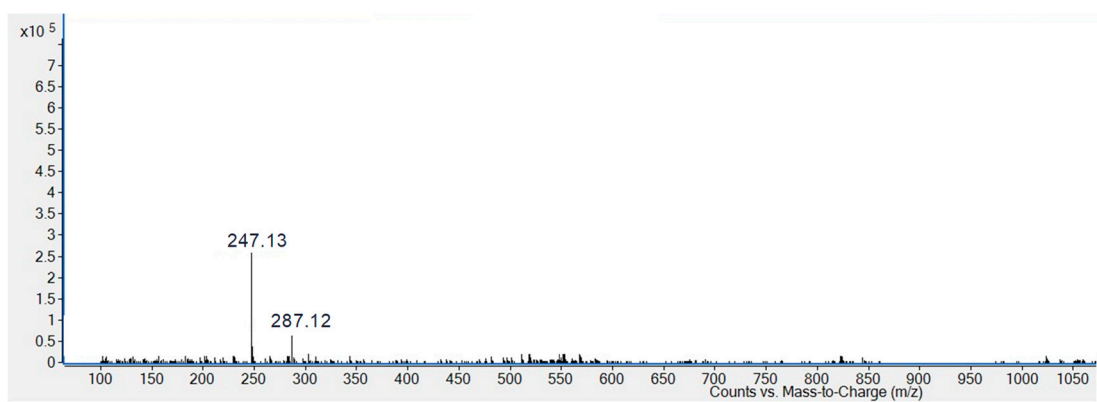

**Figure S6.** ESI MS spectrum of salonitenolide (3) recorded in positive mode.

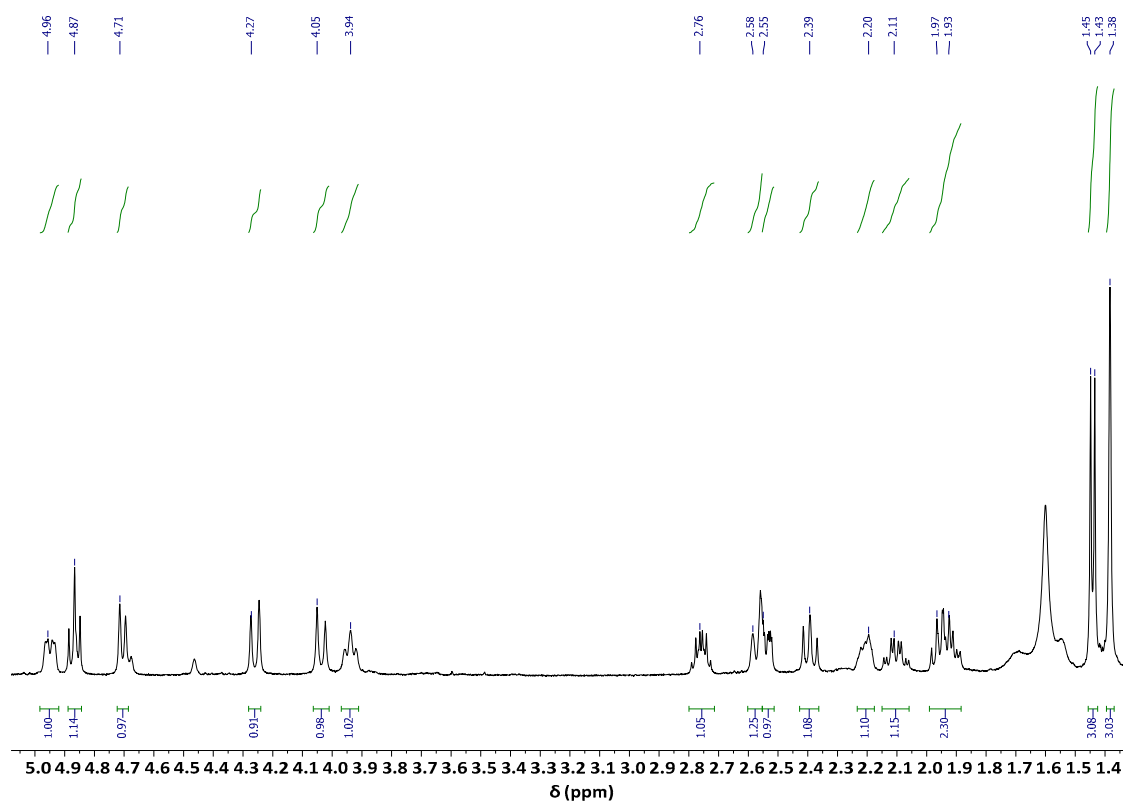

**Figure S7.** <sup>1</sup>H NMR spectrum of 11β,13-dihydrosalonitenolide (**4**) recorded in CDCl<sub>3</sub> at 400 MHz.

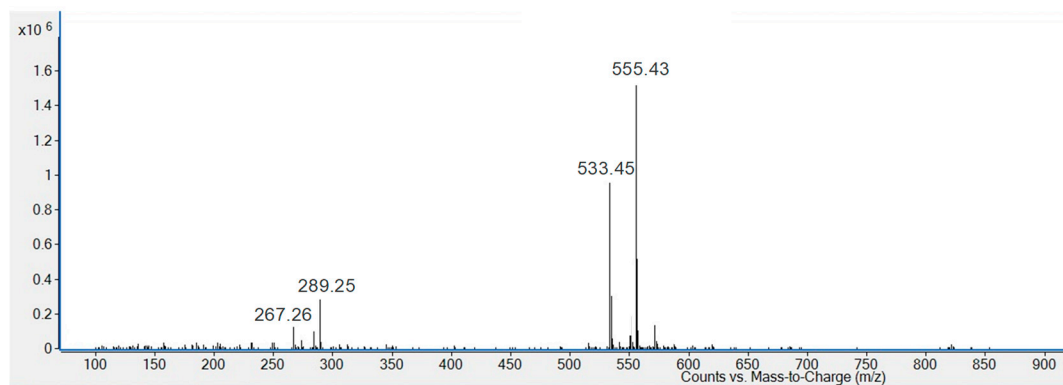

**Figure S8.** ESI MS spectrum of 11β,13-dihydrosalonitenolide (**4**) recorded in positive mode.

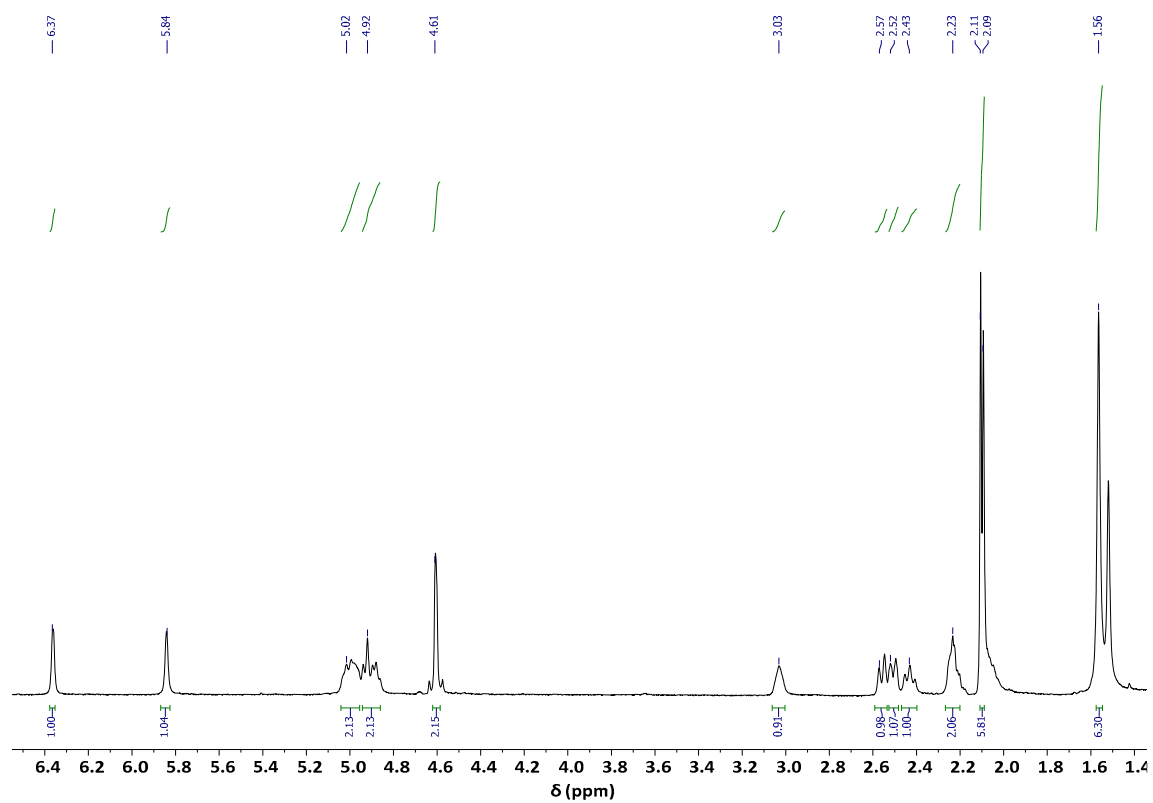

**Figure S9.** <sup>1</sup>H NMR spectrum of 8,15-*O,O'*-diacetylsalonitenolide (**5**) recorded in CDCl<sub>3</sub> at 400 MHz.

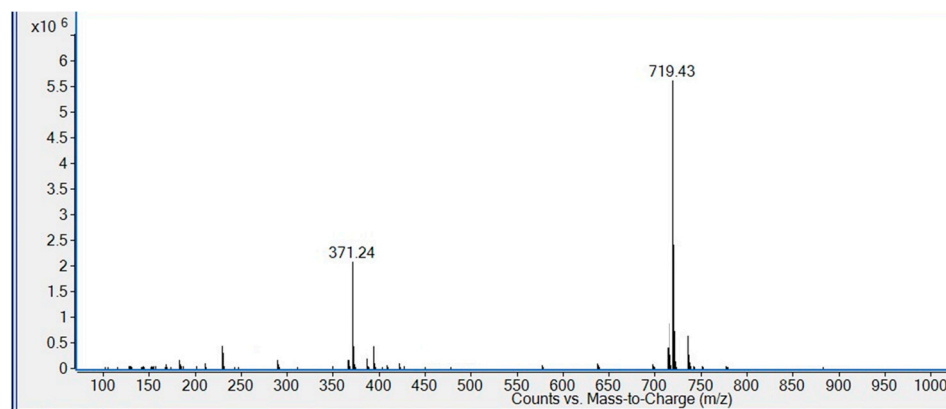

**Figure S10.** ESI MS spectrum of 8,15-*O,O'*-diacetylsalonitenolide (**5**) recorded in positive mode.
